# Supplementary material for: Room-temperature selective oxidation of 2-naphthol to BINOL using a Au/SrTiO3–H2O2catalytic system
Source: Royal Society of Chemistry journal article supplement (doi:10.1039/c5cc06438d), 2015-01-01
Supplement: c5cc06438d1.pdf [file c5cc06438d1.pdf]

# Room-temperature selective oxidation of 2-naphthol to BINOL by a Au/SrTiO<sub>3</sub>-H<sub>2</sub>O<sub>2</sub> thermocatalytic system

Shin-ichi Naya,<sup>a</sup> Yuta Hiramoto,<sup>b</sup> Miwako Teranishi,<sup>a</sup> and Hiroaki Tada<sup>a,b</sup> \*

<sup>a</sup> Environmental Research Laboratory, Kinki University, 3-4-1, Kowakae, Higashi-Osaka, Osaka 577-8502, Japan

<sup>b</sup> Department of Applied Chemistry, School of Science and Engineering, Kinki University, 3-4-1, Kowakae, Higashi-Osaka, Osaka 577-8502, Japan

\* To whom correspondence should be addressed: TEL: +81-6-6721-2332, FAX: +81-6-6727-2024,

E-mail: [h-tada@apch.kindai.ac.jp](mailto:h-tada@apch.kindai.ac.jp).

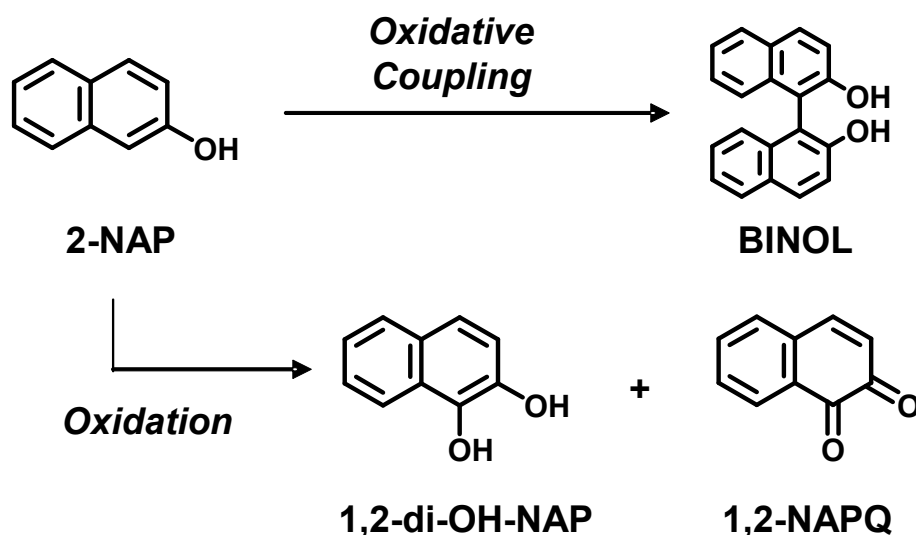

**Scheme S1.** Oxidation of 2-naphthol (2-NAP).

## Experimental details

### Catalyst preparation and characterization

Au NPs with varying size were loaded on SrTiO<sub>3</sub> particles (Aldrich, mean particle size < 100 nm) by the heating temperature-varied deposition precipitation (TV-DP) method using HAuCl<sub>4</sub> as a starting material.<sup>28,29</sup> Before use for preparation of Au/SrTiO<sub>3</sub>, SrTiO<sub>3</sub> particles were calcined at 923 K for 4 h prior, which allows us to neglect the changes of SrTiO<sub>3</sub> with different heating temperature below 873 K. The pH

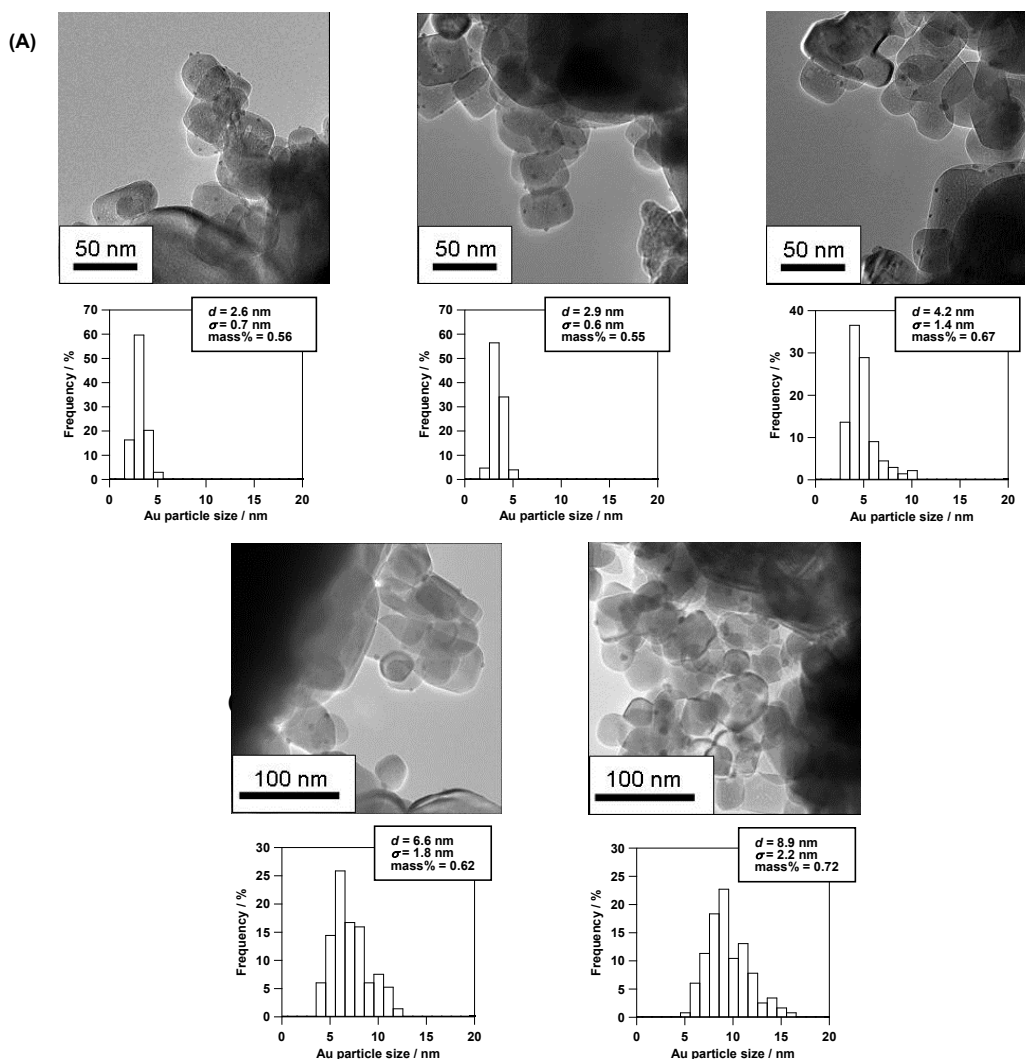

**Fig. S1** TEM images and size distribution of Au/SrTiO<sub>3</sub>: (A)  $T_c = 673$  K,  $t_c = 1$  h, (B)  $T_c = 673$  K,  $t_c = 4$  h, (C)  $T_c = 773$  K,  $t_c = 4$  h, (D)  $T_c = 873$  K,  $t_c = 4$  h, (E)  $T_c = 873$  K,  $t_c = 24$  h:  $T_c$  and  $t_c$  denote the heating temperature and time, respectively.

of aqueous HAuCl<sub>4</sub> solution (4.86 mM, 100 mL) was adjusted to 6 by the addition of 1 M NaOH aqueous solution. SrTiO<sub>3</sub> particles (10 g) were added to the solution, and the suspension was heated at 343 K for 1 h. After cooling to room temperature, the particles
